# Supplementary material for: Data-driven design of electrocatalysts: principle, progress, and perspective
Source: Royal Society of Chemistry journal article supplement (doi:10.1039/d2ta09278f), 2023-01-01
Supplement: d2ta09278f1.pdf [file d2ta09278f1.pdf]

## Supporting information

for

### **Data-Driven Design of Electrocatalysts: Principle, Progress, and Perspective**

*Shan Zhu<sup>1</sup>, Kezhu Jiang<sup>1</sup>, Biao Chen<sup>2#</sup>, and Shijian Zheng<sup>1#</sup>*

<sup>1</sup> State Key Laboratory of Reliability and Intelligence of Electrical Equipment, School of Materials Science and Engineering, Hebei University of Technology, Tianjin 300401, P. R. China

<sup>2</sup> School of Materials Science and Engineering, Tianjin University, Tianjin, 300072, P. R. China

<sup>#</sup>Corresponding Authors

We have constructed a database of different types of catalyst systems and their data-driven analysis methods extracted from the literature (Table S1). This database contains more than just electrocatalysts. Each paper is indexed by its DOI, which makes it easy for readers to search. Some of the abbreviations involved in the table are as follows: K-nearest neighbor regression (KNN), random forest regression (RF), support vector machine (SVM), gradient boosting regression (GBR), extreme gradient boosting regression (XGB), gaussian process regression (GPR), neural network (NN), convolutional neural network (CNN), smooth overlap of atomic positions (SOAP), sure independence screening and sparsifying operator (SISSO), principal component analysis (PCA), shapley additive explanation (SHAP), t-distributed stochastic neighbor embedding (t-SNE), least absolute shrinkage and selection operator (LASSO).

**Table S1.** Catalytic material systems from the literature and their data-driven analysis methods

| DOI                            | Published year | Active materials                              | Supports                                                             | Catalyst system/Devices                | Output feature/Analysis target                      | Algorithm                                     | Database                           |
|--------------------------------|----------------|-----------------------------------------------|----------------------------------------------------------------------|----------------------------------------|-----------------------------------------------------|-----------------------------------------------|------------------------------------|
| 10.1016/j.cplett.2004.07.097   | 2004           | PtRu                                          | None                                                                 | Proton exchange membrane fuel cell     | Free formation energy                               | Bayesian-guided stochastic surface walking-NN | DFT calculation                    |
| 10.1021/acs.accounts.1c00153   | 2011           | Transition metals and transition metal oxides | None                                                                 | CO methanation and OER                 | Faradaic efficiency, overpotential, current density | GBR, RF, etc.                                 | Data mining from published papers  |
| 10.1002/cjce.23756             | 2019           | Metal                                         | SiO <sub>2</sub> , TiO <sub>2</sub> , Al <sub>2</sub> O <sub>3</sub> | SO <sub>2</sub> conversion reaction    | Formation energies and binding energies             | SOAP                                          | DFT calculation                    |
| 10.1002/cctc.202100495         | 2021           | Mn                                            | Na <sub>2</sub> WO <sub>4</sub> /SiO <sub>2</sub>                    | Oxidative coupling reaction of methane | Degradation index                                   | NN                                            | Experimental test                  |
| 10.1021/acs.jpclett.0c01128    | 2020           | NRR catalysts                                 | None                                                                 | NRR, HER                               | Selectivity                                         | SVM, RF, etc.                                 | Experimental test                  |
| 10.1016/j.jpowsour.2019.226916 | 2019           | Pt                                            | Commercial supports                                                  | Fuel cell                              | Faradaic efficiency and total current density       | NN                                            | Calculation                        |
| 10.1021/jacs.1c00339           | 2021           | Cu-based catalysts                            | None                                                                 | CO <sub>2</sub> RR                     | Specific activity                                   | RF                                            | Zeolite Structures Database of IZA |

|                            |      |                             |                  |                         |                                                          |                                                                                            |                                                                                                              |
|----------------------------|------|-----------------------------|------------------|-------------------------|----------------------------------------------------------|--------------------------------------------------------------------------------------------|--------------------------------------------------------------------------------------------------------------|
| 10.1021/acs.jpcc.0c05964   | 2020 | Metal and nonmetal elements | N-doped graphene | CO <sub>2</sub> RR      | XANES spectra                                            | NN, PCA                                                                                    | Theoretical XANES calculated by FEFF9 code                                                                   |
| 10.1039/d0ta08004g         | 2020 | BAC                         | N-doped graphene | ORR                     | Thermodynamic stability                                  | Genetic algorithm                                                                          | DFT calculation                                                                                              |
| 10.1021/acs.jctc.9b00420   | 2019 | Metal                       | None             | Carbon reforming        | The feature of nanoparticles                             | ML-accelerated genetic algorithms                                                          | PtAu 147 atom icosahedron simulation                                                                         |
| 10.1039/d1cp02198b         | 2021 | Nanoparticles               | None             |                         | Surface segregation energies                             | GBR                                                                                        | DFT calculation                                                                                              |
| 10.1002/cctc.202101481     | 2022 | SAC                         | None             | Ethanol dehydrogenation | Spectroscopic signal                                     | Automatic target generation process pre-conditioned Joint-nonnegative matrix factorization | Electron energy-loss spectroscopy (EELS) dataset                                                             |
| 10.1002/smt.202100035      | 2021 | Pd                          | TiO <sub>2</sub> |                         | SO <sub>2</sub> conversion, catalytic productivity, etc. | NN                                                                                         | Data mining from 31 published papers                                                                         |
| 10.1021/acs.iecr.8b04801   | 2019 | NiPt                        | None             | Ammonia decomposition   | Power density, output voltage, etc.                      | NN, XGB, DT, etc.                                                                          | Data mining from 64 published papers; Experimental test                                                      |
| 10.1038/s41524-021-00514-8 | 2021 | Alloy                       | None             | HER                     | Power density of devices                                 | NN, DT, XGB, SHAP, etc.                                                                    | Experimental test of 126 records corresponding to different membrane electrode assembly preparation and test |

|                            |      |                                                                    |                     |                                         |                                  |                          | parameters                                   |
|----------------------------|------|--------------------------------------------------------------------|---------------------|-----------------------------------------|----------------------------------|--------------------------|----------------------------------------------|
| 10.1021/jacs.0c11261       | 2021 | Pt nanowire                                                        | None                | HER                                     | Peak power density               | XGB                      | 339 original reports from experimental tests |
| 10.1021/acs.jcm.1c00726    | 2021 | Metal nanoparticles                                                | None                | HER                                     | Overpotential                    | NN, SVM, KNN, CNN, etc.  | Published data sets with about 6000 samples  |
| 10.1021/acs.jpcc.1c05470   | 2021 | Pt(111)                                                            | None                |                                         | Overpotential                    | Sequential learning      | High throughput experiments                  |
| 10.1021/acs.jpcc.1c02890   | 2021 | Pt-based alloy                                                     | None                | ORR                                     | Overpotential                    | RF                       | DFT calculation                              |
| 10.1039/d1nr07661b         | 2022 | Pd <sub>40</sub> Ni <sub>10</sub> Cu <sub>30</sub> P <sub>20</sub> | None                | HER                                     | Overpotential                    | CNN                      | Materials Project                            |
| 10.1002/er.7602            | 2022 | Pd                                                                 | Carbon nanotubes    | Formic acid fuel cell                   | O binding energy                 | Regression algorithms    | DFT calculation                              |
| 10.1021/acsam.1c23221      | 2022 | Pt-based catalysts                                                 | Commercial supports | Fuel cell                               | O adsorption energy              | CNN                      | DFT calculation                              |
| 10.1038/s41598-021-81403-4 | 2021 | Cu                                                                 | Zeolite             | Direct oxidation of methane to methanol | NO conversion rate               | GBR, SVM, XGB, KNN, etc. | Data mining from over 2000 published papers  |
| 10.1021/acs.jclett.1c01851 | 2021 | Pt-based alloy                                                     | None                |                                         | NH <sub>3</sub> production rates | RF                       | Thermodynamic data from Materials Project.   |

|                                       |      |                                       |                                                         |                                                                      |                                             |                          |                                          |
|---------------------------------------|------|---------------------------------------|---------------------------------------------------------|----------------------------------------------------------------------|---------------------------------------------|--------------------------|------------------------------------------|
| 10.1021/acs.jp<br>clett.9b03678       | 2020 | Mn                                    | $\text{Na}_2\text{WO}_4/\text{SiO}_2$                   | Oxidative<br>coupling<br>reaction of<br>methane                      | Nanoparticles                               | NN                       | DFT calculations                         |
| 10.1039/d0cy0<br>1751e                | 2021 | Metal and oxide                       | None                                                    | Low-<br>temperatur<br>e oxidative<br>coupling of<br>methane<br>(OCM) | Nanoparticle sizes                          | Unsupervised<br>learning | TEM results from<br>experiments          |
| 10.1021/acscat<br>al.9b02416          | 2019 | $\text{IrO}_x$                        | None                                                    | OER                                                                  | $\text{CO}_2$ conversion rates              | KNN, DT, SVM,<br>etc.    | Data mining from 100<br>published papers |
| 10.1016/j.ces.2<br>021.116902         | 2022 | Ru                                    | $(\text{BaO})_x(\text{CaO})_y(\text{Al}_2\text{O}_3)_z$ | Ammonia<br>synthesis                                                 | Mass activity                               | GBR, SVM                 | Experimental test                        |
| 10.1021/acs.ch<br>emmater.9b03<br>686 | 2020 | Metal                                 | None                                                    | NRR                                                                  | Lattice constants and<br>formation energies | Genetic algorithm<br>NN  | DFT calculation                          |
| 10.1016/j.matt.<br>2020.11.010        | 2021 | Au                                    | None                                                    | $\text{CO}_2\text{RR}$                                               | Interpret the EXAFS                         | NN                       | Molecular dynamics<br>simulation         |
| 10.1039/c9ta1<br>3404b                | 2020 | SAC                                   | N-doped<br>graphene                                     | ORR,<br>OER, HER                                                     | Intermediate binding<br>energies            | GPR                      | DFT calculation                          |
| 10.1002/adfm.<br>202100547            | 2021 | Co SAC                                | N-doped<br>carbon                                       | HER                                                                  | Infrared spectrum of<br>CO                  | NN                       | DFT calculation                          |
| 10.1021/acs.jp<br>clett.9b01428       | 2019 | Materials in the<br>Materials Project | None                                                    |                                                                      | Hydrogen yield                              | PCA, NN, SHAP            | Data mining from 46<br>published papers  |

|                            |      | database                          |                                |                          |                         |                                                                                   |                                             |  |
|----------------------------|------|-----------------------------------|--------------------------------|--------------------------|-------------------------|-----------------------------------------------------------------------------------|---------------------------------------------|--|
| 10.1002/cjoc.202100352     | 2021 | Au <sub>13</sub> Pt <sub>42</sub> | None                           | ORR                      | HER activity            | Adaptive Neuro-Fuzzy Inference optimized by Gray Wolf Optimization, NN, SVM, etc. | DFT calculation                             |  |
| 10.1016/j.jmat.2021.02.005 | 2021 | MOF                               | None                           | CO <sub>2</sub> fixation | Half-Wave Potential     | PCA, NN, SHAP, etc.                                                               | Data mining from published papers           |  |
| 10.1021/jacs.8b08800       | 2018 | AgAu alloy nanoclusters           | None                           |                          | H binding energy        | NN                                                                                | DFT calculation                             |  |
| 10.1063/1.5126597          | 2019 | CuO                               | None                           | Methanation reaction     | H binding energy        | Genetic algorithm                                                                 | Experimental test                           |  |
| 10.1038/s41467-021-22204-1 | 2021 | Pt                                | None                           |                          | Adsorption energy of *H | ML-based method BEEF-vdW                                                          | DFT calculation                             |  |
| 10.1021/acscami.1c20289    | 2021 | Pt                                | Commercial supports            | Fuel cell                | Adsorption energy of *H | SVM NN                                                                            | CASTEP calculation                          |  |
| 10.3390/en13092182         | 2020 | Alloy                             | None                           |                          | Adsorption energy of *H | RF, etc.                                                                          | DFT calculation                             |  |
| 10.1002/aic.17041          | 2020 | Pt(111)                           | None                           |                          | Fingerprint of XANES    | Extra trees regressor and classification                                          | Ab initio XANES simulations                 |  |
| 10.1021/acscami.1c06714    | 2021 | CuPd alloy                        | Al <sub>2</sub> O <sub>3</sub> |                          | Faradaic efficiencies   | DT, RF, XGB, etc.                                                                 | Molecular structure data, experimental test |  |

|                               |      |                               |                     |                           |                                           |                                            |                                                                           |
|-------------------------------|------|-------------------------------|---------------------|---------------------------|-------------------------------------------|--------------------------------------------|---------------------------------------------------------------------------|
| 10.1039/d1re00396h            | 2022 | Binary alloy                  | None                | Ethanol dehydrogenation   | Energy barriers and *CO adsorption energy | GPR                                        | DFT calculation                                                           |
| 10.1021/acscobsci.0c00102     | 2020 | Alloy                         | None                | HER                       | Energy                                    | NN                                         | Data from stochastic surface waling (SSW) method                          |
| 10.1021/acs.jpclett.0c00634   | 2020 | Alloy, Metal                  | None                | CO <sub>2</sub> RR        | Diffusion coefficient                     | Classification algorithm                   | Experimental test                                                         |
| 10.1002/anie.202006928        | 2020 | Non-precious metals catalysts | Commercial supports | Fuel cell                 | Current density                           | SVM, etc.                                  | Experimental test                                                         |
| 10.1021/acs.jpcc.8b09284      | 2018 | Metal                         | None                |                           | Cu coordination number                    | NN                                         | XANES spectra                                                             |
| 10.1021/acscatal.9b04343      | 2020 | High entropy alloys           | None                | CO <sub>2</sub> RR        | CO conversion rate                        | DT, NN                                     | Experimental test                                                         |
| 10.1021/acs.jpclett.1c01319   | 2021 | Alloy                         | None                | Multi-reactions           | CO conversion                             | NN, SVM, etc.                              | Data mining from published papers                                         |
| 10.1021/acs.chemmater.6b04229 | 2017 | Alloy                         | None                | CO <sub>2</sub> RR        | CO and H binding energy                   | Crystal graph convolutional neural network | Materials Project                                                         |
| 10.1021/acs.jpca.9b07569      | 2020 | Transition metals             | None                |                           | Cleavage energy                           | CNN                                        | DFT calculation including 36 kinds of elements                            |
| 10.1021/jacs.1c04624          | 2021 | Fe-based catalysts            | None                | Fischer-Tropsch synthesis | Classification of Au nanoparticles        | Extra trees regressor, t-SNE               | 1300 Au nanoparticles generated from molecular dynamics (MD) trajectories |



|                              |      |                                              |                                                   |                                                        |                                                                                              |                                            |                                                 |
|------------------------------|------|----------------------------------------------|---------------------------------------------------|--------------------------------------------------------|----------------------------------------------------------------------------------------------|--------------------------------------------|-------------------------------------------------|
| 10.1016/j.cej.2021.131285    | 2021 | Metal-based catalysts                        | None                                              | Supercritical water gasification (SCWG)                | Binding energies of CH <sub>x</sub> , NH <sub>x</sub> , OH <sub>x</sub> , and OOH adsorbates | SVM, RF, Elastic net, etc.                 | Alchemical perturbation DFT (APDFT) calculation |
| 10.1039/d1ta06772a           | 2021 | Mn-Ce-M(M=Co, Cu, and Fe) mixed oxide system | None                                              | Selective catalytic reduction (SCR) of NO <sub>x</sub> | Catalytic activity and selectivity                                                           | LAASO                                      | VASP calculation                                |
| 10.1039/d0ta04615a           | 2020 | (100) surface of Alloy                       | None                                              | HER                                                    | Carbon deposition resistance                                                                 | PCA, SVM, GPR, etc.                        | Experimental test                               |
| 10.1039/d1ta09184k           | 2022 | Alloy                                        | None                                              | ORR                                                    | Calculation accuracy                                                                         | Active Learning                            | Kinetic Monte Carlo (KMC) calculation           |
| 10.1039/c7sc03422a           | 2018 | Alloy                                        | None                                              | CO <sub>2</sub> RR                                     | C <sub>2</sub> H <sub>6</sub> yield                                                          | SVM                                        | Experimental test                               |
| 10.1021/acs.jcim.8b00657     | 2019 | Ag-based alloy                               | None                                              |                                                        | C <sub>2</sub> yield                                                                         | XGB, SHAP, etc.                            | Data mining (4759 OCM reaction data)            |
| 10.1021/acs.jpcllett.0c03465 | 2021 | Mn, Ti, Pd,                                  | Na <sub>2</sub> WO <sub>4</sub> /SiO <sub>2</sub> | Methane oxidation                                      | C <sub>2</sub> yield                                                                         | Gaussian mixture model                     | Experimental test of 58 OCM catalysts           |
| 10.1039/d0sc06502a           | 2021 | Au nanoparticles                             | TiO <sub>2</sub>                                  | CO oxidation reaction                                  | Binding energy of H*, O*, OH* and OOH*                                                       | RF                                         | DFT calculation                                 |
| 10.1039/c9ta07651d           | 2020 | Alloy and SAC                                | None                                              | Ethanol decomposition, non-oxidative                   | Binding energy of CO/H                                                                       | CNN, graph representation of bulk crystals | Materials Project                               |

|                            |      |                                |                  |                                   |                                                  |               |                                                                                                   |
|----------------------------|------|--------------------------------|------------------|-----------------------------------|--------------------------------------------------|---------------|---------------------------------------------------------------------------------------------------|
| 10.1021/acsomega.1c01726   | 2021 | Pt                             | None             | dehydrogenation                   | Binding energies                                 | GBR, etc.     | CatApp, DFT calculation                                                                           |
| 10.3390/molecules26216362  | 2021 | Metal active sites             | None             | OER                               | Binding energies                                 | GBR           | DFT calculation                                                                                   |
| 10.1021/acsclett.7b02010   | 2017 | RhAu Alloy                     | None             | NO decomposition                  | Average charge difference                        | NN            | DFT calculation of 3388 adsorption free energies                                                  |
| 10.1021/acscatal.1c02029   | 2021 | Ag                             | None             | Ethene epoxidation                | Atomic structure                                 | Deep learning | Atomic electron tomography data                                                                   |
| 10.1038/s41598-021-00031-0 | 2021 | Metal                          | N-doped graphene | HER                               | Aggregation energies and *O adsorption energy    | GPR, etc.     | DFT calculation                                                                                   |
| 10.1021/acscatal.0c02158   | 2020 | Pd                             | None             | Selective acetylene hydrogenation | Adsorption energy; Formation energy              | ReQM, NN      | ReQM calculation                                                                                  |
| 10.1021/acsclett.1c03395   | 2021 | Pt                             | None             | HER                               | Adsorption energy of *O and *C                   | GBR           | Calculation                                                                                       |
| 10.3389/fchem.2019.00444   | 2019 | Ni <sub>5</sub> P <sub>4</sub> | None             | HER                               | Adsorption energy of *H, *N and *NH <sub>x</sub> | CNN           | High-throughput DFT computation for nitrogen adsorption on various compositions of CoMoFeNiCu HEA |

|                              |      |                    |                           |                                   |                                        |                   |                                                                                  |
|------------------------------|------|--------------------|---------------------------|-----------------------------------|----------------------------------------|-------------------|----------------------------------------------------------------------------------|
|                              |      |                    |                           |                                   |                                        |                   | (111) surfaces                                                                   |
| 10.1021/acscatal.9b01985     | 2019 | (Ni-Fe-CoCe) $O_x$ | Commercial supports       | Water oxidation                   | Adsorption energy of *H, *O, *CO       | NN, Crystal Graph | DFT calculation and Materials Project                                            |
| 10.1021/jacs.1c02471         | 2021 | PdAg alloy         | TiO <sub>2</sub>          | Acetylene selective hydrogenation | Adsorption energy of *H and *CO        | SSW-NN, LASP      | Potential energy surface PES data obtained from the SSW global PES sampling      |
| 10.1021/jacs.0c06401         | 2020 | Pd, Ag             | Ag                        |                                   | Adsorption energy of *H                | SOAP, KRR         | DFT calculation                                                                  |
| 10.1021/acs.jctc.9b00986     | 2020 | Pt(111)            | None                      |                                   | Adsorption energy of *H                | NN                | DFT calculation                                                                  |
| 10.1038/s41524-019-0181-4    | 2019 | PtAu               | None                      |                                   | Adsorption energy of C intermediates   | NN                | 247 C <sub>4</sub> species; 29 smaller C <sub>2</sub> and C <sub>3</sub> species |
| 10.1021/acs.nanolett.1c01516 | 2021 | Au nanoparticles   | Amorphous silicon nitride |                                   | Adsorption energy of *OOH, *O, and *OH | RF                | DFT calculation                                                                  |
| 10.3390/crystl1091035        | 2021 | High Entropy Oxide | None                      |                                   | Adsorption energy of *OH               | GBR               | DFT calculation                                                                  |
| 10.1021/acs.jpcc.0c04432     | 2020 | SAC                | N-doped graphene          | HER                               | Adsorption energy of *CO, *OH          | NN                | DFT calculation                                                                  |
| 10.1021/acs.jpcc.0c04432     | 2021 | High entropy       | None                      | Ammonia                           | Adsorption energy of                   | GPR               | DFT calculation of the                                                           |

|                              |      |                    |          |                   |                          |                                  |                                                                                                                                                                      |
|------------------------------|------|--------------------|----------|-------------------|--------------------------|----------------------------------|----------------------------------------------------------------------------------------------------------------------------------------------------------------------|
| clett.1c01242                |      | alloy              |          | decomposition     | *CO and *H               |                                  | HEAs' (111) facets                                                                                                                                                   |
| 10.1021/acs.jpcc.1c09082     | 2021 | Ru-based catalysts | None     |                   | Adsorption energy of *CO | RF                               | DFT calculation                                                                                                                                                      |
| 10.1021/acscatal.0c02089     | 2020 | Pt-based alloy     | None     | Ethanol Reforming | Adsorption energy of *CO | Regression algorithms            | DFT calculation                                                                                                                                                      |
| 10.1021/acschemmater.7b01860 | 2017 | Metal in zeolites  | Zeolites | NRR, CO2RR        | Adsorption energy of *CO | GBR                              | DFT calculation                                                                                                                                                      |
| 10.1039/c7ta01812f           | 2017 | Bimetallic alloy   | None     | Methane oxidation | Adsorption energy of *H  | SISSO                            | DFT calculation                                                                                                                                                      |
| 10.1039/c9sc05999g           | 2020 | Oxides             | None     | OER               | Adsorption energy        | XGB, SISSO                       | Calculation of adsorption energies containing 506 datasets on TMs, 178 datasets on TM clusters, 281 datasets on SAAs, 258 datasets on ABs, and 1178 datasets on HEAs |
| 10.1063/5.0009129            | 2020 | Au nanoparticles   | None     | HER, HOR, ORR     | Adsorption energy        | NN with 36453 network parameters | DFT calculation                                                                                                                                                      |
| 10.1038/s41467-020-15340-7   | 2020 | Pt                 | None     | CO adsorption     | Adsorption energy        | Lasso, SVM, GB, etc.             | Calculation                                                                                                                                                          |
| 10.1021/jacs.9b04956         | 2019 | Au nanoparticles   | None     | CO2RR             | Adsorption energy        | KRR, GP, SVM, etc.               | DFT calculation                                                                                                                                                      |

|                            |      |                                                     |                                       |                    |                   |                                             |                                                                                                        |
|----------------------------|------|-----------------------------------------------------|---------------------------------------|--------------------|-------------------|---------------------------------------------|--------------------------------------------------------------------------------------------------------|
| 10.1002/slct.201902627     | 2019 | Additives of Ni/Al <sub>2</sub> O <sub>3</sub>      | Al <sub>2</sub> O <sub>3</sub>        | CO methanation     | Adsorption energy | kinetic Monte Carlo (KMC), CNN, SOAP, t-SNE | DFT calculation                                                                                        |
| 10.1016/j.ched.2012.08.017 | 2013 | Au, Au/MO <sub>x</sub> (M = Mg, Mn, Co, Ce, Fe, Ni) | Al <sub>2</sub> O <sub>3</sub>        | CO oxidation       | Adsorption energy | Kernel Ridge Regression, Active Learning    | DFT calculation                                                                                        |
| 10.1021/acscatal.1c01473   | 2021 | ZIF-derived catalysts                               | Carbon                                | ORR                | Adsorption energy | IsoMap, GPR, PCA                            | DFT calculation                                                                                        |
| 10.1021/acs.jpcc.0c01492   | 2020 | SAC                                                 | None                                  | Multi-reactions    | Adsorption energy | GPR, KRR, etc.                              | DFT calculation                                                                                        |
| 10.1038/s41467-020-20342-6 | 2021 | Alloy                                               | None                                  |                    | Adsorption energy | Genetic algorithm                           | DFT calculation                                                                                        |
| 10.1002/cctc.202000536     | 2020 | SAC                                                 | N-doped graphene                      |                    | Adsorption energy | CNN                                         | High-throughput dataset containing 37,000 adsorption energies on 2000 unique bimetallic alloy surfaces |
| 10.3389/fenrg.2021.609070  | 2021 | Metal                                               |                                       | CO <sub>2</sub> RR | Adsorption energy | Bootstrapped Projected Gradient Descent     | DFT calculation of 298 alloys with 13 descriptors                                                      |
| 10.1021/acscatal.1c01018   | 2021 | Pt                                                  | None                                  | HER                | Adsorption energy | KRR, GBR, RFR, etc.                         | Computational Materials Repository (CMR)                                                               |
| 10.1039/c9cy02070e         | 2020 | Cu SAC and alloy                                    | None                                  |                    | Adsorption energy | SOAP, GPR                                   | DFT calculation of 540 sites                                                                           |
| 10.1016/j.ijhy             | 2014 | Pt/Au-based                                         | Al <sub>2</sub> O <sub>3</sub> , MgO, | Water gas          | Adsorption energy | NN                                          | DFT calculation                                                                                        |

|                              |      |                                          |                        |                                |                                                                                            |                                  |                                                               |
|------------------------------|------|------------------------------------------|------------------------|--------------------------------|--------------------------------------------------------------------------------------------|----------------------------------|---------------------------------------------------------------|
| dene.2014.01.<br>160         |      | catalysts                                | etc.                   | shift<br>reaction              |                                                                                            |                                  |                                                               |
| 10.1021/acs.jpcc.6b12800     | 2017 | Pt nanocluster                           | None                   | Adsorption<br>of CO            | Adsorption Energy                                                                          | LASSO, SVM,<br>NN, PCA, etc.     | DFT calculation                                               |
| 10.1021/jacs.7b07139         | 2017 | Fluid catalytic<br>cracking<br>particles | Commercial<br>supports | Fluid<br>catalytic<br>cracking | Adsorption Energies<br>of H, N <sub>2</sub> , N <sub>2</sub> H, NH,<br>and NH <sub>2</sub> | CNN                              | DFT calculation of 3040<br>surfaces in 465 catalysts          |
| 10.1021/acsaem.0c01466       | 2020 | Fe, Zn                                   | None                   | ORR                            | *CO binding energy                                                                         | NN, KRR                          | DFT calculation of 263<br>alloys                              |
| 10.1016/j.cattod.2016.04.013 | 2017 | Transition metals                        | None                   | CO <sub>2</sub> RR             | *CO adsorption<br>energy                                                                   | NN                               | DFT calculation                                               |
| 10.1021/acs.jcm.9b00550      | 2019 | Alloy                                    | None                   |                                | Gibbs free energy<br>change of CO<br>adsorption                                            | XGBR, KNR, RF,<br>SVM, GBR, etc. | VASP calculation                                              |
| 10.1039/C8CP03801E           | 2018 | Pt-based alloy                           | None                   | ORR                            | Adsorption enthalpy                                                                        | SISSO                            | Data mining from<br>published papers                          |
| 10.1021/acsam.1c16696        | 2021 | Cu/Co/Ni/Zn/Mg<br>-based alloy           | None                   | CO <sub>2</sub> RR             | CO adsorption<br>energy and HOCO<br>transition state<br>formation energy                   | NN                               | DFT calculation                                               |
| 10.1021/acsam.1c22309        | 2021 | Transition metals                        | None                   | OER, ORR                       | Electrocatalytic<br>activity                                                               | NN                               | Ab-initio molecular<br>dynamics (AIMD) and<br>DFT calculation |

---

**Table S2.** Typical machine learning software or data analysis platform

| <b>Name</b>      | <b>Website</b>                                                                          | <b>Description</b>                                          |
|------------------|-----------------------------------------------------------------------------------------|-------------------------------------------------------------|
| Python           | <a href="https://www.python.org/">https://www.python.org/</a>                           | A basic programming language.                               |
| Scikit-learn     | <a href="https://scikit-learn.org/">https://scikit-learn.org/</a>                       | The machine learning tools are based on Python.             |
| Julia            | <a href="https://julialang.org/">https://julialang.org/</a>                             | An open-source programming language for data science.       |
| PyTorch          | <a href="https://pytorch.org/">https://pytorch.org/</a>                                 | An optimized tensor library for deep learning.              |
| TensorFlow       | <a href="https://www.tensorflow.org/">https://www.tensorflow.org/</a>                   | A machine learning platform.                                |
| Jupyter Notebook | <a href="https://jupyter.org/">https://jupyter.org/</a>                                 | A web service for interactive computing.                    |
| Orange           | <a href="https://orangedatamining.com/">https://orangedatamining.com/</a>               | An open source for machine learning and data visualization. |
| Weka             | <a href="https://waikato.github.io/weka-wiki/">https://waikato.github.io/weka-wiki/</a> | An open-source for machine learning.                        |
| Matlab           | <a href="https://www.mathworks.com">https://www.mathworks.com</a>                       | A business mathematical software for data analysis.         |
| Theano           | <a href="https://pypi.org/project/Theano/">https://pypi.org/project/Theano/</a>         | A Python library for fast numerical calculation.            |
